# Supplementary material
Source: publisher site journal article supplement (https://www.spandidos-publications.com/188/downloadSupplementary)

Figure S1. miRNAs are expressed differentially in bladder cancer. (A) miRNA expression in bladder cancer samples with specific amplification of gene copy number from TCGA dataset. (B) miRNA expression in bladder cancer samples with specific deletion of gene copy number from TCGA dataset. (C) miRNA expression in bladder cancer samples with different stages from TCGA dataset. \* $P < 0.05$ , \*\* $P < 0.01$  and \*\*\* $P < 0.001$ , with comparisons indicated by brackets. TCGA, The Cancer Genome Atlas; NS, not significant.

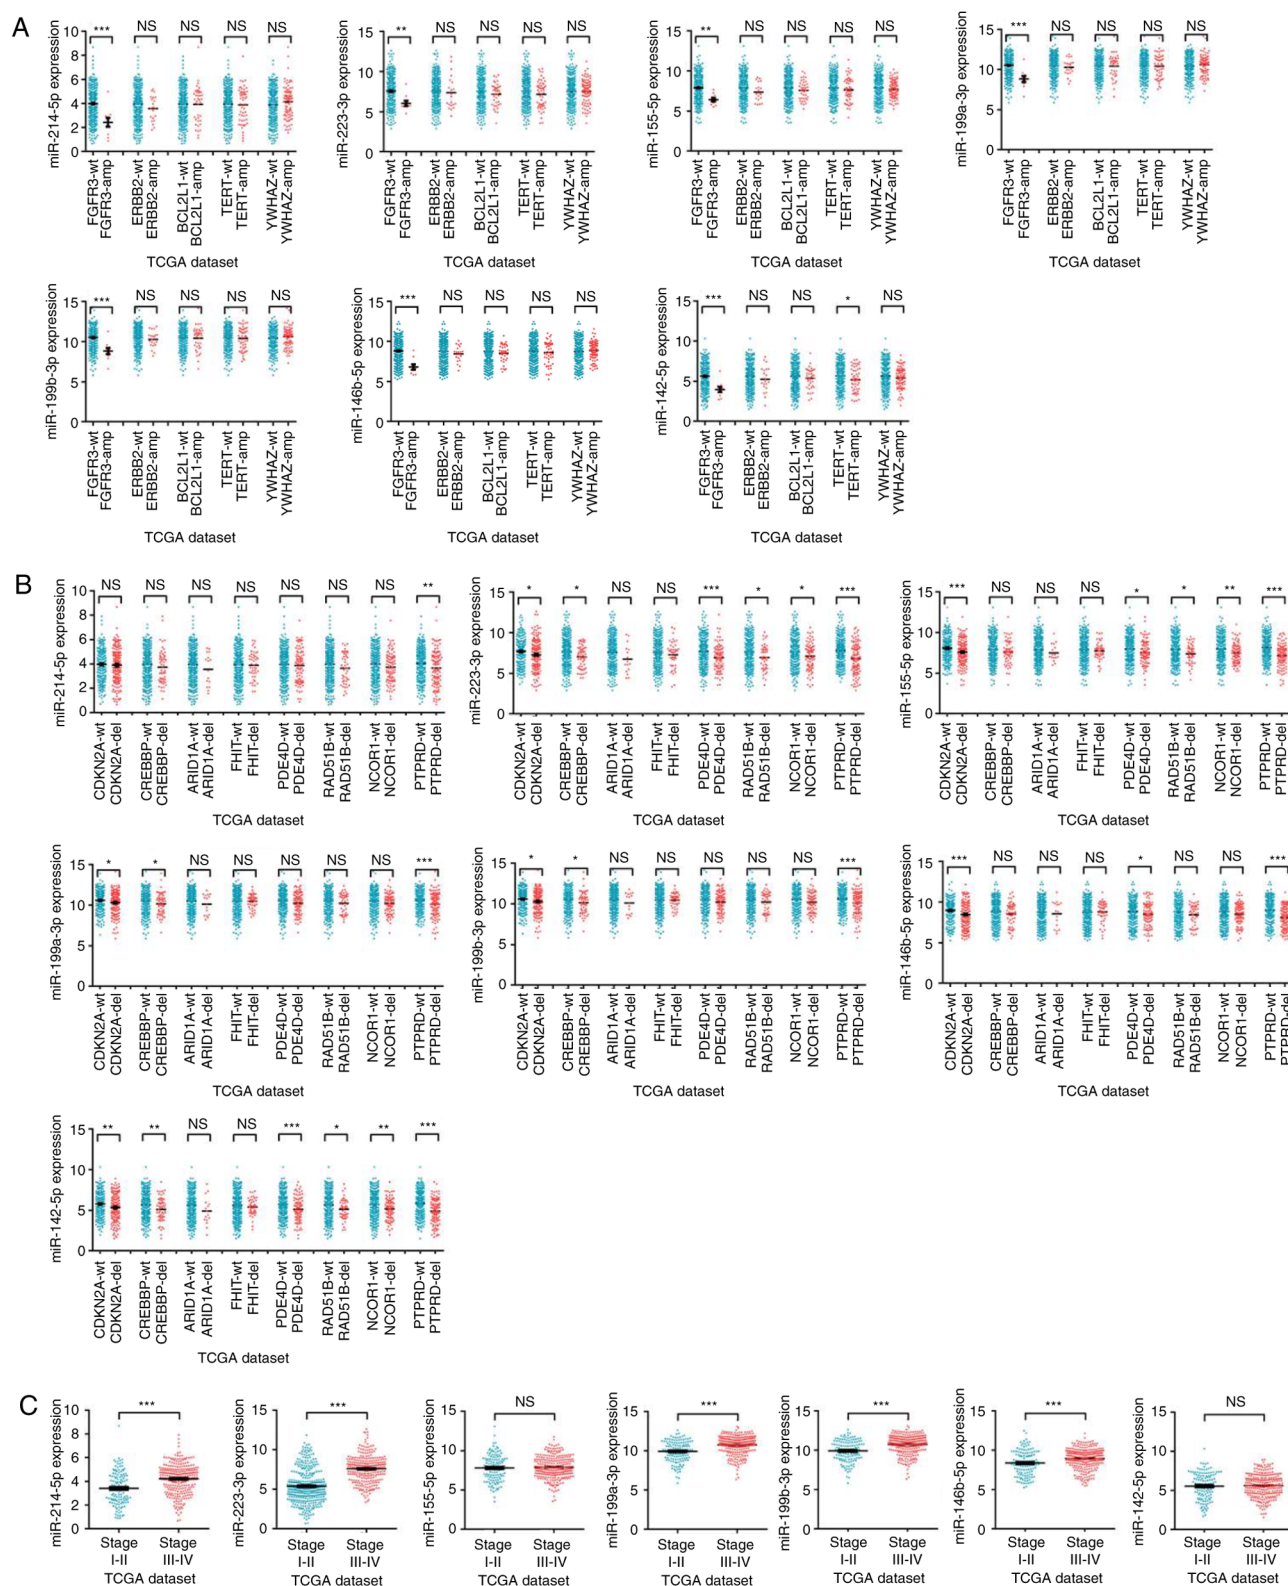

Supplement: Supplementary file 1 [file downloadSupplementary]
